# Supplementary material for: Insights into the Genetic Diversity of <i>Leishmania (Viannia) panamensis</i> in Panama Inferred by Multilocus Sequence Typing (MLST)
Source: Preprints.org preprint supplement (doi:10.20944/preprints202304.1024.v1), 2023-04-27
Supplement: Supplementary file 1 [file Supplementary Table 2.1.docx]

Table S2. Determination of the local *Leishmania panamensis* diploid sequences by the MLSTest software.

| **Name** | **Aconitase** | **ALAT** | **GPI** | **HSP70** | **DSTs** |
| --- | --- | --- | --- | --- | --- |
| **FID16203-010** | 1 | 1 | 1 | 1 | 1 |
| **FID16203-028** | 1 | 1 | 1 | 1 | 1 |
| **FID16203-034** | 1 | 1 | 1 | 1 | 1 |
| **FID16203-037** | 1 | 1 | 2 | 1 | 2 |
| **FID16203-038** | 1 | 1 | 1 | 1 | 1 |
| **FID16203-042** | 1 | 1 | 1 | 1 | 1 |
| **FID16203-044** | 1 | 1 | 1 | 1 | 1 |
| **FID16203-046** | 1 | 2 | 1 | 1 | 3 |
| **FID16203-050** | 1 | 1 | 1 | 1 | 1 |
| **FID16203-052** | 1 | 1 | 1 | 1 | 1 |
| **FID16203-054** | 1 | 1 | 1 | 1 | 1 |
| **FID16203-055** | 1 | 1 | 1 | 1 | 1 |
| **FID16203-062** | 1 | 1 | 3 | 1 | 4 |
| **FID16203-065** | 2 | 1 | 1 | 1 | 5 |
| **FID16203-069** | 3 | 1 | 1 | 1 | 6 |
| **FID16203-093** | 4 | 1 | 1 | 1 | 7 |
| **FID16203-097** | 1 | 1 | 1 | 1 | 1 |
| **FID16203-101** | 1 | 1 | 1 | 1 | 1 |
| **FID16203-104** | 1 | 1 | 1 | 1 | 1 |
| **FID16203-110** | 1 | 2 | 1 | 1 | 3 |
| **FID16203-114** | 1 | 1 | 1 | 1 | 1 |
| **FID16203-118** | 1 | 1 | 1 | 1 | 1 |
| **FID16203-126** | 1 | 1 | 1 | 1 | 1 |
| **FID16203-127** | 1 | 1 | 1 | 1 | 1 |
| **FID16203-129** | 1 | 1 | 1 | 1 | 1 |
| **FID16203-139** | 1 | 1 | 1 | 1 | 1 |
| **FID16203-140** | 3 | 1 | 1 | 1 | 6 |
| **FID16203-148** | 1 | 1 | 4 | 1 | 8 |
| **FID16203-166** | 1 | 1 | 1 | 1 | 1 |
| **FID16203-170** | 1 | 1 | 1 | 1 | 1 |
| **FID16203-174** | 1 | 1 | 1 | 1 | 1 |
| **FID16203-176** | 5 | 1 | 1 | 1 | 9 |
| **FID16203-178** | 1 | 1 | 1 | 1 | 1 |
| **FID16203-179** | 1 | 1 | 1 | 1 | 1 |
| **FID16203-182** | 1 | 1 | 1 | 1 | 1 |
| **FID16203-189** | 1 | 1 | 1 | 1 | 1 |
| **FID16203-227** | 1 | 1 | 1 | 1 | 1 |
| **FID16203-232** | 3 | 1 | 1 | 1 | 6 |
| **FID16203-241** | 1 | 1 | 1 | 1 | 1 |
| **FID16203-249** | 1 | 1 | 1 | 1 | 1 |
| **FID16203-256** | 4 | 1 | 1 | 1 | 7 |
| **FID16203-265** | 1 | 1 | 1 | 1 | 1 |
| **FID16203-364** | 1 | 1 | 1 | 1 | 1 |
| **FID16203-413** | 4 | 1 | 1 | 1 | 7 |
| **FID16203-440** | 3 | 1 | 1 | 1 | 6 |
| **FID16203-446** | 1 | 1 | 1 | 1 | 1 |
| **FID16203-453** | 4 | 3 | 1 | 1 | 10 |
| **FID16203-454** | 3 | 1 | 5 | 2 | 11 |
| **FID16203-475** | 3 | 1 | 1 | 1 | 6 |
| **FID16203-479** | 1 | 1 | 1 | 1 | 1 |
| **FID16203-509** | 1 | 1 | 1 | 1 | 1 |
| **FID16203-514** | 1 | 1 | 1 | 1 | 1 |
| **FID16203-529** | 1 | 1 | 1 | 1 | 1 |
| **FID16203-674** | 1 | 1 | 1 | 3 | 12 |
| **FID16203-684** | 1 | 1 | 1 | 1 | 1 |
| **FID16203-687** | 1 | 1 | 1 | 1 | 1 |
| **FID16203-693** | 1 | 1 | 1 | 1 | 1 |
| **FID16203-695** | 6 | 1 | 1 | 1 | 13 |
| **FID16203-712** | 1 | 1 | 1 | 1 | 1 |
| **FID16203-C1404** | 1 | 1 | 1 | 1 | 1 |
| **FID16203-C14131** | 1 | 1 | 1 | 1 | 1 |
| **FID16203-C1602** | 1 | 1 | 1 | 1 | 1 |
| **FID16203-C1605** | 1 | 1 | 1 | 1 | 1 |
| **FID16203-C1611** | 1 | 1 | 1 | 1 | 1 |
| **FID16203-C1625** | 1 | 1 | 1 | 1 | 1 |
| **FID16203-C16-120** | 1 | 1 | 1 | 1 | 1 |
| **FID16203-C1721** | 1 | 1 | 1 | 1 | 1 |
| **FID16203-C1819** | 3 | 1 | 1 | 1 | 6 |
| **FID16203-C1877** | 1 | 1 | 1 | 1 | 1 |
| **Number of Alleles** | 6 | 3 | 5 | 3 | 13 |
| **Number of Polymorphisms** | 4 | 2 | 12 | 2 | 20 |
| **Typing Efficiency** | 1.5 | 1.5 | 0.417 | 1.5 | 0.85 |
| **Discriminatory Power** | 0.374 | 0.111 | 0.139 | 0.084 | 0.491 |
